# Supplementary material for: Diagnosis of SARS-CoV-2 during the Pandemic by Multiplex RT-rPCR hCoV Test: Future Perspectives
Source: MDPI journal article supplement (doi:10.3390/pathogens11111378), 2022-11-18
Supplement: s1 [file s1]

**Table S1:** Comparison among the results of the GSD NovaType II SARS-CoV-2/GSD NovaType III SARS-CoV-2 kits versus the results of NGS. The 835 positive cases of SARS-CoV-2 detected by the MPL RT-rPCR were detected by confirmatory test and sequencing by NGS, too. From these results, we can conclude that the MPL RT-rPCR is sensitive to detect the SARS-CoV-2 directly from the samples regardless of the different variants.

| GSD RT PCR | Pangolin Lineage | Nextstrain clade | No of detected case | GSD RT PCR | Pangolin Lineage | Nextstrain clade | No of detected case |
|------------|------------------|------------------|---------------------|------------|------------------|------------------|---------------------|
| DELTA      | AY.102           | Delta, AY        | 24                  | DELTA      | AY.66            | Delta, AY        | 2                   |
|            | AY.103           | Delta, AY        | 2                   |            | AY.68            | Delta, AY        | 3                   |
|            | AY.111           | Delta, AY        | 1                   |            | AY.7.2           | Delta, AY        | 14                  |
|            | AY.116           | Delta, AY        | 7                   |            | AY.71            | Delta, AY        | 3                   |
|            | AY.120           | Delta, AY        | 6                   |            | AY.72            | Delta, AY        | 4                   |
|            | AY.120.2         | Delta, AY        | 1                   |            | AY.75            | Delta, AY        | 2                   |
|            | AY.121           | Delta, AY        | 3                   |            | AY.77            | Delta, AY        | 1                   |
|            | AY.122           | Delta, AY        | 46                  |            | AY.89            | Delta, AY        | 2                   |
|            | AY.122.1         | Delta, AY        | 1                   |            | AY.9.1           | Delta, AY        | 2                   |
|            | AY.124           | Delta, AY        | 4                   |            | AY.92            | Delta, AY        | 11                  |
|            | AY.125           | Delta, AY        | 25                  |            | AY.96            | Delta, AY        | 1                   |
|            | AY.19            | Delta, AY        | 3                   |            | AY.98            | Delta, AY        | 1                   |
|            | AY.22, .23       | Delta, AY        | 2                   |            | AY.98.1          | Delta, AY        | 19                  |
|            | AY.25            | Delta, AY        | 1                   |            | B.1.1.7          | Alpha, V1        | 1                   |
|            | AY.33            | Delta, AY        | 5                   |            | B.1.525          | Eta              | 1                   |
|            | AY.34            | Delta, AY        | 27                  |            | B.1.617.2        | Delta            | 60                  |
|            | AY.36            | Delta, AY        | 2                   | ALPHA      | BA.1             | Omicron          | 1                   |
|            | AY.37            | Delta, AY        | 2                   |            | AY.4             | Delta, AY        | 1                   |
|            | AY.39            | Delta, AY        | 2                   |            | B.1.1.7          | Alpha, V1        | 38                  |
|            | AY.4             | Delta, AY        | 44                  |            | B.1.375          | Beta?            | 1                   |
|            | AY.4.2.2         | Delta, AY        | 1                   |            | Q1               | Alpha, Q1        | 9                   |
|            | AY.4.2.3         | Delta, AY        | 2                   |            | Q4               | Alpha, Q4        | 1                   |
|            | AY.4.5           | Delta, AY        | 2                   | GAMMA      | AY.117           | Delta, AY        | 1                   |
|            | AY.40            | Delta, AY        | 2                   |            | AY.125           | Delta, AY        | 1                   |
|            | AY.42            | Delta, AY        | 30                  |            | B.1.1.7          | Alpha, V1        | 1                   |
|            | AY.43            | Delta, AY        | 169                 |            | P.1              | Gamma            | 1                   |
|            | AY.44            | Delta, AY        | 3                   |            | P.1.12           | Gamma            | 3                   |
|            | AY.46.6          | Delta, AY        | 31                  |            | B.1.1.529        | Omicron          | 1                   |
|            | AY.5             | Delta, AY        | 17                  | OMICRON    | BA.1             | Omicron          | 109                 |
|            | AY.53            | Delta, AY        | 2                   |            | BA.1.1           | Omicron          | 39                  |
|            | AY.58            | Delta, AY        | 2                   |            | BA.2             | Omicron          | 1                   |
|            | AY.6             | Delta, AY        | 1                   | OTHER      | B.1.1.523        | Omicron?         | 2                   |
|            | AY.61            | Delta, AY        | 27                  |            | C.37             | Lamda            | 1                   |
